# Supplementary material
Source: publisher site journal article supplement (https://www.dovepress.com/article/239667)
Supplement: Supplementary file 1 [file get_supplementary_file.php]

**Expert consensus on injection technique and area-specific recommendations for the hyaluronic acid dermal filler VYC-12L to treat fine cutaneous lines**

Patricia Ogilvie, MD1, Jesper Thulesen, MD, PhD, DrMedSci, FEBO2, Christophe Leys, MD3, Dimitris Sykianakis, MD, PhD4, Jonquille Chantrey, MD5, Marva Safa, MD6, Vitor Figueiredo, MD7, Izolda Heydenrych, MD8, Maurizio Cavallini, MD9, Elin Langeland, RN10, and Anne Wetter, MD11

Patricia Ogilvie, MD1, Jesper Thulesen, MD, PhD, DrMedSci, FEBO2, Christophe Leys, MD3, Dimitris Sykianakis, MD, PhD4, Jonquille Chantrey, MD5, Marva Safa, MD6, Vitor Figueiredo, MD7, Izolda Heydenrych, MD8, Maurizio Cavallini, MD9, Elin Langeland, RN10, and Anne Wetter, MD11

**Supplemental Table**

**Supplemental Table.** Experience-Phase Survey Questions and Results

| **Question** | **Response** | **% of Participants, N=128** | |
| --- | --- | --- | --- |
| **First Patient** | **Last Patient** |
| What is your preferred injection technique? | Micro-depot | 83.5 | 82.3 |
| Fanning | 7.0 | 7.4 |
| Cross-hatch | 4.4 | 4.4 |
| Sheeting with cannula | 5.2 | 5.9 |
| Please provide details of your micro-depot* technique regarding: |  |  |  |
| Spacing between injections, cm | 0.1‒0.5 | 2.1 | 5.3 |
| 0.5 | 15.6 | 12.3 |
| >0.5‒1.0 | 58.3 | 61.4 |
| 2.0‒10 | 13.5 | 12.3 |
| 15 | 2.1 | 1.8 |
| Other | 8.3 | 7.0 |
| Quantity injected at each point, mL | 0.01‒0.05 | 66.3 | 59.7 |
| 0.05‒0.1 | 13.7 | 8.8 |
| 0.2‒1.0 | 4.2 | 8.8 |
| 2‒5 | 8.4 | 17.5 |
| 10–25 | 6.3 | 5.3 |
| Other | 1.0 | 0 |
| Angle of needle/cannula to skin, degrees | 10 | 1.0 | 0 |
| 15–40 | 28.1 | 39.3 |
| 45 | 50.0 | 39.3 |
| 60–75 | 5.2 | 5.4 |
| 90 | 9.4 | 7.1 |
| Other | 6.3 | 5.0 |
| If you had the choice, which needle/cannula would you prefer to use with this product? | 30G 1/2" | 9.4 | 5.8 |
| 30G 1/6" | 2.6 | 5.8 |
| 32G 1/2" | 53.9 | 63.8 |
| 32G 3/16" | 14.5 | 11.6 |
| Cannula: 30G 23 mm | 10.3 | 2.9 |
| Cannula: 30G 19 mm | 1.7 | 0 |
| Other | 7.7 | 10.1 |

| **Question** | **Mean Rating** | |
| --- | --- | --- |
| **First Patient** | **Last Patient** |
| On a scale of 1–10, how acceptable do you think treatment with this product is to a patient? | 8.3 (n=116) | 8.5 (n=69) |
| On a scale of 1–10, how happy would you be to recommend this product to other medical practitioners? | 8.5 (n=115) | 8.5 (n=69) |

*Details about injection technique are shown for micro-depot technique only because micro-depot was the technique preferred by >80% of participants.
